# Supplementary material for: A quantitative neuropathological assessment of translocator protein expression in multiple sclerosis
Source: PubMed Central journal article supplement — Brain. 2019 Oct 3;142(11):3440–55. doi: 10.1093/brain/awz287 (PMC6821167; doi:10.1093/brain/awz287), 2019-10-03
Supplement: awz287_supplementary_data.pdf [file awz287_supplementary_data.pdf]

## Supplementary Figure 1. TSPO expression in endothelial cells in white and grey matter lesions

Endothelial TSPO expression shown as a percentage of total TSPO expression. Endothelial TSPO expression contributes for a small part to total TSPO expression in the white matter (A). Endothelial contribution to the TSPO signal is increased in control grey matter and NAGM compared to the white matter and the NAWM, as well as compared to grey matter lesions (B). P-values see table. CON WM= control white matter, NAWM= normal appearing white matter, CON GM= control grey matter, NAGM= normal appearing grey matter, CA= chronic active, LC = leukocortical lesion.

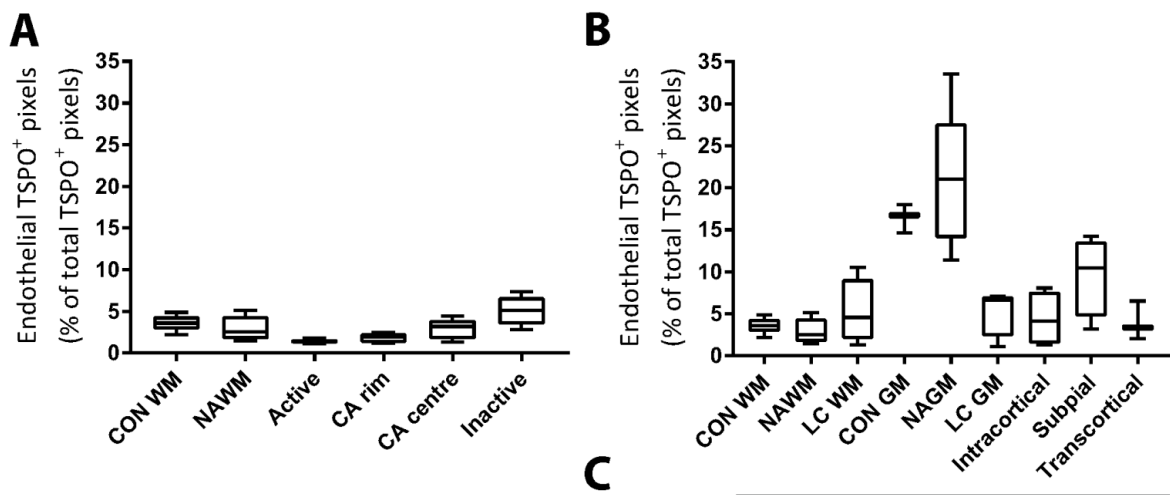

**C**

| Sidak's multiple comparisons test |      | P Value |
|-----------------------------------|------|---------|
| CON GM vs. Type 1 GM              | *    | 0.0225  |
| CON GM vs. Type 2                 | *    | 0.0104  |
| CON GM vs. Type 4                 | *    | 0.0144  |
| NAGM vs. Type 1 GM                | **** | <0.0001 |
| NAGM vs. Type 2                   | **** | <0.0001 |
| NAGM vs. Type 3                   | **   | 0.0023  |
| NAGM vs. Type 4                   | **** | <0.0001 |
| CON WM vs. CON GM                 | **   | 0.0033  |
| NAWM vs. NAGM                     | **** | <0.0001 |
